# Supplementary figures and images for: Gene Profiling of the Ascorbate Oxidase Family Genes under Osmotic and Cold Stress Reveals the Role of AnAO5 in Cold Adaptation in Ammopiptanthus nanus
Source: MDPI journal article supplement (doi:10.3390/plants12030677), 2023-02-03

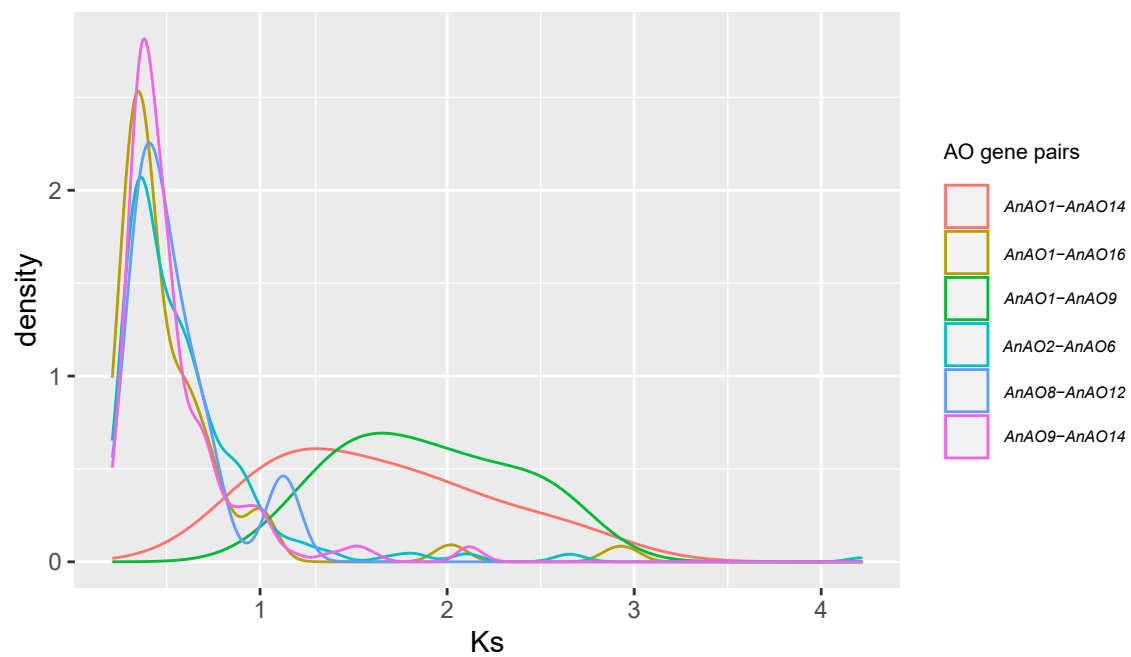

Supplement: s1 [file s1]
